# Supplementary material for: Methylation panel is a diagnostic biomarker for Barrett’s oesophagus in endoscopic biopsies and non-endoscopic cytology specimens
Source: PubMed Central journal article supplement (PMC6176521; doi:10.1136/gutjnl-2017-314026), 2017-10-30
Supplement: gutjnl-2017-314026supp001.pdf [file gutjnl-2017-314026supp001.pdf]

1  
2  
3 ***Supplementary Figure 1: Barrett's Methylation candidates***

4 These data were from Alvi et al 2013. (A) Boxplots representing the methylation level of the  
5 differentially methylated genes in Barrett's compared to normal tissue. (B) Heatmap  
6 representing the non-supervised hierarchical clustering of patients according to the  
7 methylation level of genes of interest.  
8  
9  
10

11  
12  
13 ***Supplementary Figure 2: Methylation level of B3GAT2, CDX2 and Vimentin***

14 Boxplots representing the methylation level of the B3GAT2, CDX2 and Vimentin (VIM)  
15 genes in Barrett's compared to normal tissue from Alvi et al 2013 dataset.  
16  
17  
18

19  
20 ***Supplementary Figure 3: Methylation levels of our identified markers according to the***  
21 ***length of the Barrett's segment using the Cytosponge™.***  
22

23 Dotplot presenting sensitivity variation by circumferential (C) and maximal (M) Barrett's  
24 length.  
25  
26  
27

28 ***Supplementary Figure 4: Methylation status in dysplasia and adenocarcinoma.***

29 Boxplot of normalised beta values showing hypermethylation of each gene candidate in  
30 Barrett's and Oesophageal adenocarcinoma biopsies compared to normal tissue – data  
31 extracted from Alvi's dataset (Alvi et al., 2013)  
32  
33  
34

35 **References**

36 Alvi MA, Liu X, O'Donovan M, et al. DNA methylation as an adjunct to histopathology to  
37  
38 detect prevalent, inconspicuous dysplasia and early-stage neoplasia in Barrett's  
39  
40 esophagus. *Clin Cancer Res* 2013;19(4):878-88. doi: 10.1158/1078-0432.CCR-12-2880  
41  
42  
43  
44  
45  
46  
47  
48  
49  
50  
51  
52  
53  
54  
55  
56  
57  
58  
59  
60

**A**

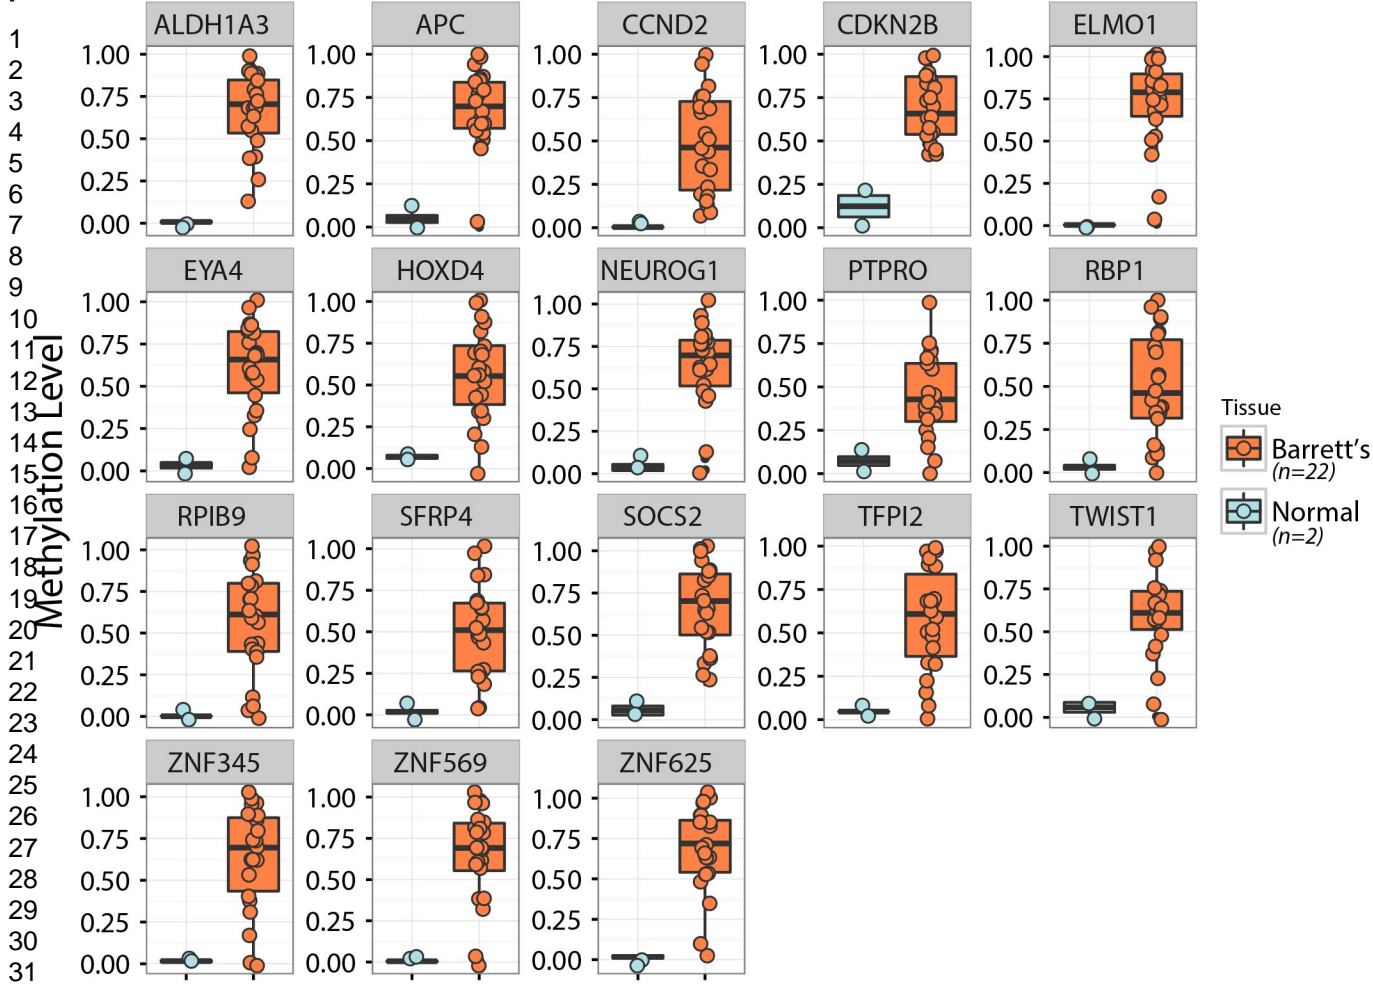

**B**

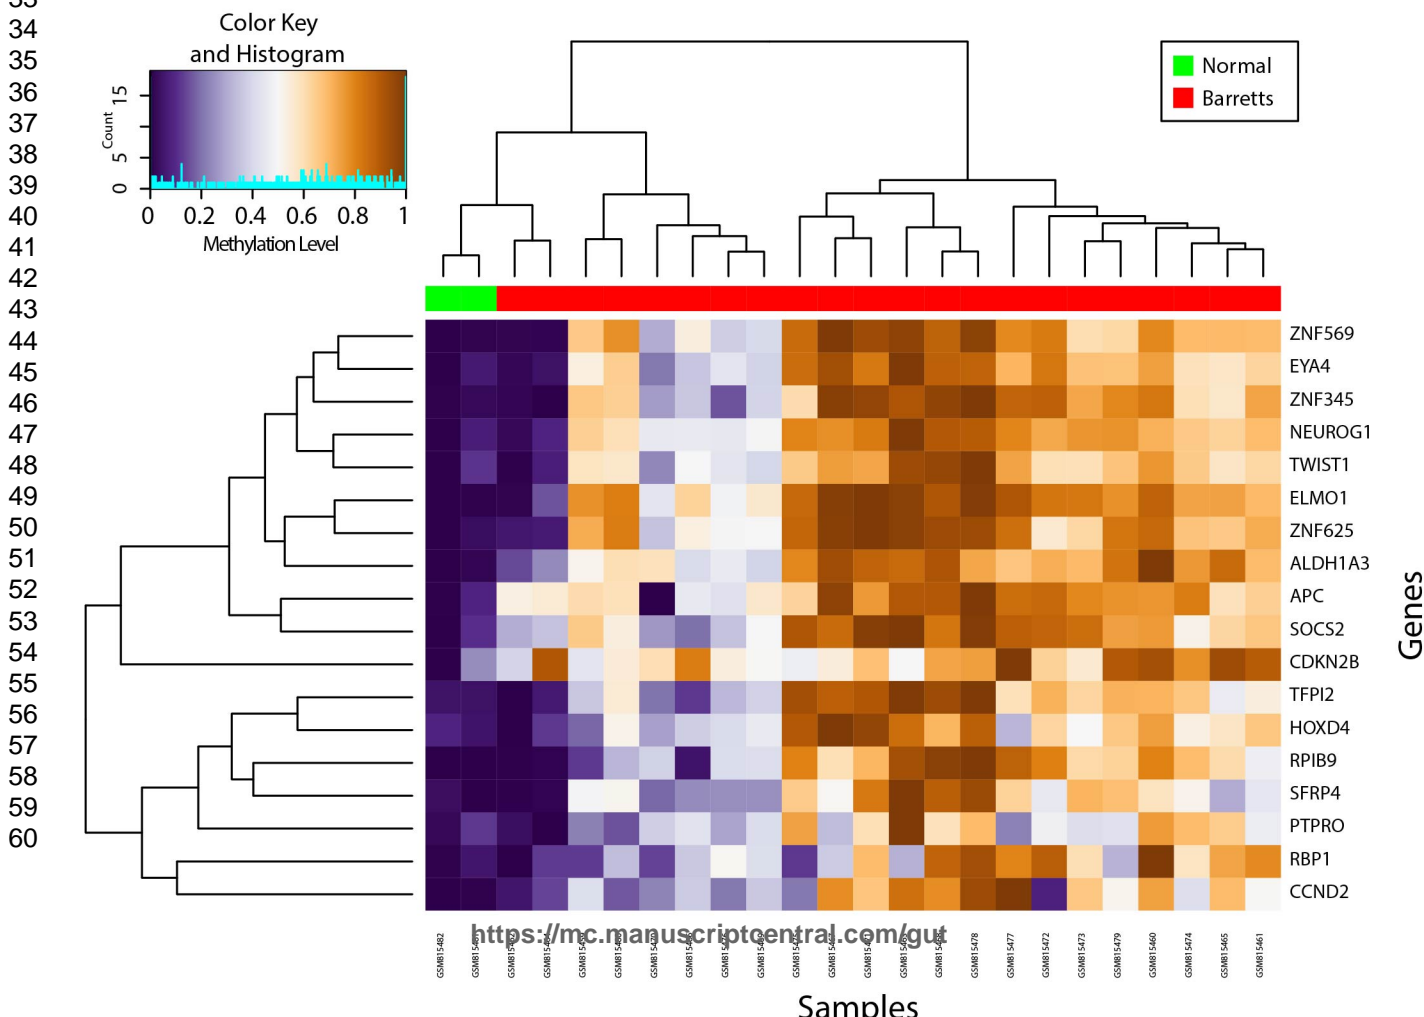

Supplementary Figure 2

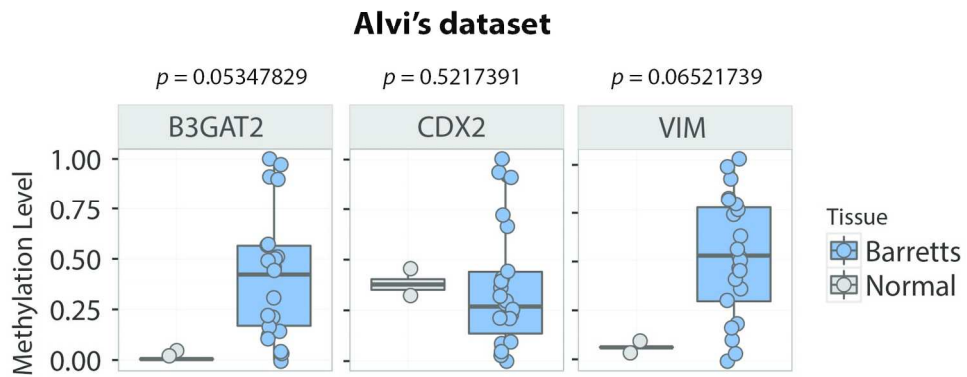

178x78mm (300 x 300 DPI)

1  
2  
3  
4  
5  
6  
7  
8  
9  
10  
11  
12  
13  
14  
15  
16  
17  
18  
19  
20  
21  
22  
23  
24  
25  
26  
27  
28  
29  
30  
31  
32  
33  
34  
35  
36  
37  
38  
39  
40  
41  
42  
43  
44  
45  
46  
47  
48  
49  
50  
51  
52  
53  
54  
55  
56  
57  
58  
59  
60

Supplementary Figure 3

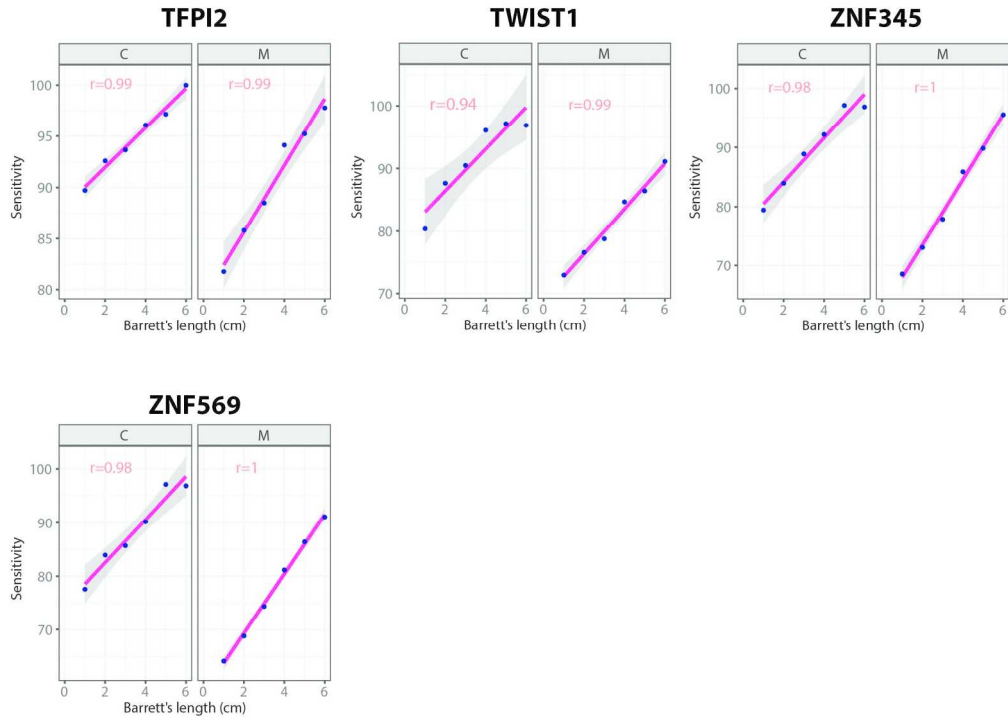

198x156mm (300 x 300 DPI)

Review Only

1  
2  
3  
4  
5  
6  
7  
8  
9  
10  
11  
12  
13  
14  
15  
16  
17  
18  
19  
20  
21  
22  
23  
24  
25  
26  
27  
28  
29  
30  
31  
32  
33  
34  
35  
36  
37  
38  
39  
40  
41  
42  
43  
44  
45  
46  
47  
48  
49  
50  
51  
52  
53  
54  
55  
56  
57  
58  
59  
60

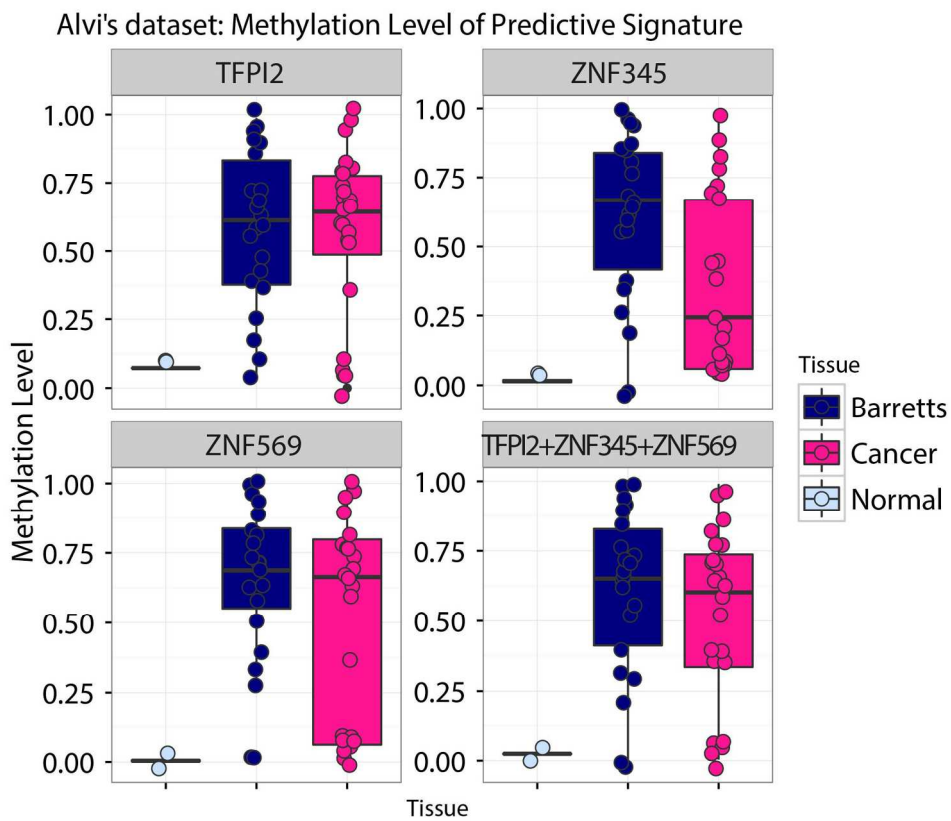

176x164mm (300 x 300 DPI)

new Only
