# Supplementary material for: Methylation panel is a diagnostic biomarker for Barrett’s oesophagus in endoscopic biopsies and non-endoscopic cytology specimens
Source: PubMed Central journal article supplement (PMC6176521; doi:10.1136/gutjnl-2017-314026), 2017-10-30
Supplement: gutjnl-2017-314026supp002.pdf [file gutjnl-2017-314026supp002.pdf]

| Sequence Definition | Probe Sequence                            | Sense Primer                   | Anti-sense Primer             |
|---------------------|-------------------------------------------|--------------------------------|-------------------------------|
| TFPI2               | [6FAM]CGTTTGCGGGGAGGAGGTGCGCGGTT[TAM]     | TGTAGGGGGTCGGGCGGTT            | CGCTCGCCCCGCATAAAACG          |
| ALDH1A3_1           | [6FAM]CCCTACGACTTCGAAACCCGACGA[TAM]       | AACTCCCTACCGAATCGAATATCC       | GTTCTGTTTTATTTCTGTTCTGTTCTG   |
| ALDH1A3_2           | [6FAM]AAACCCGCCTACAACGTAAACGCAAATCT[TAM]  | TTTATCCCCGAATCGACACGAAAA       | ATTAGGTTGTTGAGGTTAATATAGAAACG |
| APC                 | [6FAM]CAACAACACCTCTCACGCATACGCATTAT[TAM]  | GCATAACAACTCTAATCTCCGAAC       | TAGGTTTTCGGCGGTTATATTTTCG     |
| CCND2_1             | [6FAM]CTCACGCCTATCGCATCTACCGCCT[TAM]      | ATAAATAACAAACGACAAACGCTCG      | AGAGTTCGTTAGGTTTGTGTATTCG     |
| CCND2_2             | [6FAM]AACGCTACCTTCCGAACTACTCTACTTC[TAM]   | CTACAAAACCTACTCACCATCGAA       | ATTATTTTGCGTATGTAGGTTTGGAG    |
| CDKN2B              | [6FAM]CGACCGCTCAAACGCTCAAATCCAC[TAM]      | AATCCACTACCCGCTAACTACTC        | CGTTTGGTATTGTGAGTAATTATTGAGAT |
| ELMO1               | [6FAM]TATACCCATCCTCGCCGCTCCCG[TAM]        | CGACGACGTAATAACTCTACCTC        | GGGTAGTAGTCGGTCGATTTAGA       |
| EYA4                | [6FAM]ACGCCTAAACTTTCCCGATACCGAATACG[TAM]  | GAATAACTAACCCTAACTCTTCGA       | CGATTAGTGTGGAGATTAGAACG       |
| HOXD4_1             | [6FAM]ACGATCCCGAACGACCTACACCCG[TAM]       | CAATAAACCCCAACTACACCGATA       | ATTTTAATTCGACGGCGTTTTGTTA     |
| HOXD4_2             | [6FAM]CGCCGACTACTACGACGACGACGC[TAM]       | AAATATTTACAAAACGACTACCTAAACGAA | TTGTTGCGTATTTCCGCGTAGGTTAG    |
| NEUROG1             | [6FAM]CCTTAAATACCCGACGCAACAATAAACGCC[TAM] | GAATATAACACGACTAACCTCAAAA      | TGATTTGTCGTTTCGTTTTATTATTTCG  |
| PTPRO               | [6FAM]CGCCATTATAAACCGCCGCGAAA[TAM]        | GACGCCAAAATCTAAAACATAAC        | TTTTCTGGGTAGGTTTATTCG         |
| RBP1                | [6FAM]ACCCGAAAATAAACGCCCTCCGAAAACA[TAM]   | CTACCGATACTACGCGAATAATAAAC     | GAATTTAGTTGTCGTCGTTTCGTA      |
| RPIB9               | [6FAM]TATTCCTAAACCCGAACTCCCGATTCCG[TAM]   | GAACCGCGTCGTTCTAAACTTA         | GTTTAAGGAGGAGCGTGGTGTAG       |
| SFRP4               | [6FAM]AACAAACAACCTCGTCGAAACCAAATTT[TAM]   | ATAACTCAAACGAAATACACACGC       | TTTATTAAGTCGTGAAGTCGGTGT      |
| SFRP4               | [6FAM]TTACCAAATCTCGTCGCAACCGCCG[TAM]      | CTACTCTAAAACCGAGTTTAACT        | GGGTATTTGAGGTTGTGTATTTCG      |
| TWIST1              | [6FAM]ACTCCCGCCGCGCTACTACTACC[TAM]        | CGTCTACAACCTCTGTAACACTACG      | TCGGGTAGTTTCGTTTAGGGTAAG      |
| ZNF345_1            | [6FAM]ACGTAATAAAAACGACTCGAAACCTAACGC[TAM] | TAAATTTAATAAAAACGAACTAACCTAT   | TACGTAGTTTATATAGGTCGGGAG      |
| ZNF345_2            | [6FAM]CGACTCCTCCACACGCTACGCAACTAC[TAM]    | ACGCTCAAATACCACATTAATAACG      | TTAATTGTGTTTCGGAGGTTGTTTG     |
| ZNF569_1            | [6FAM]CGCCACAAATCTCGATCCGTTACACCAA[TAM]   | GACACTAAAACCGACGCTATCGAT       | GAAGTTAGTTTCGTTTCGGGTGAGT     |
| ZNF569_2            | [6FAM]CCCGTCCCTATAACCGAACCAAATCTG[TAM]    | CCACACCAACCGTATAATATAACG       | GTAGTTTCGCGTAGGTTTGTAAAT      |
| ZNF625              | [6FAM]TCCATAACCCCTCCGTAATCTCCGCAC[TAM]    | ACCACACACCCGAAACAAAATTAC       | GTAGTCGGGATTTTAGGCGTTTTG      |
| beta-actin          | [6FAM]ACCACCACCCAACACACAATAACAAACACA[TAM] | TGGTGATGGAGGAGGTTTAGTAAGT      | AACCAATAAACCTACTCTCCCTTAA     |
